# Supplementary material
Source: PubMed Central journal article supplement (PMC4978566)
Supplement: NIHMS804937-supplement-1.pdf [file NIHMS804937-supplement-1.pdf]

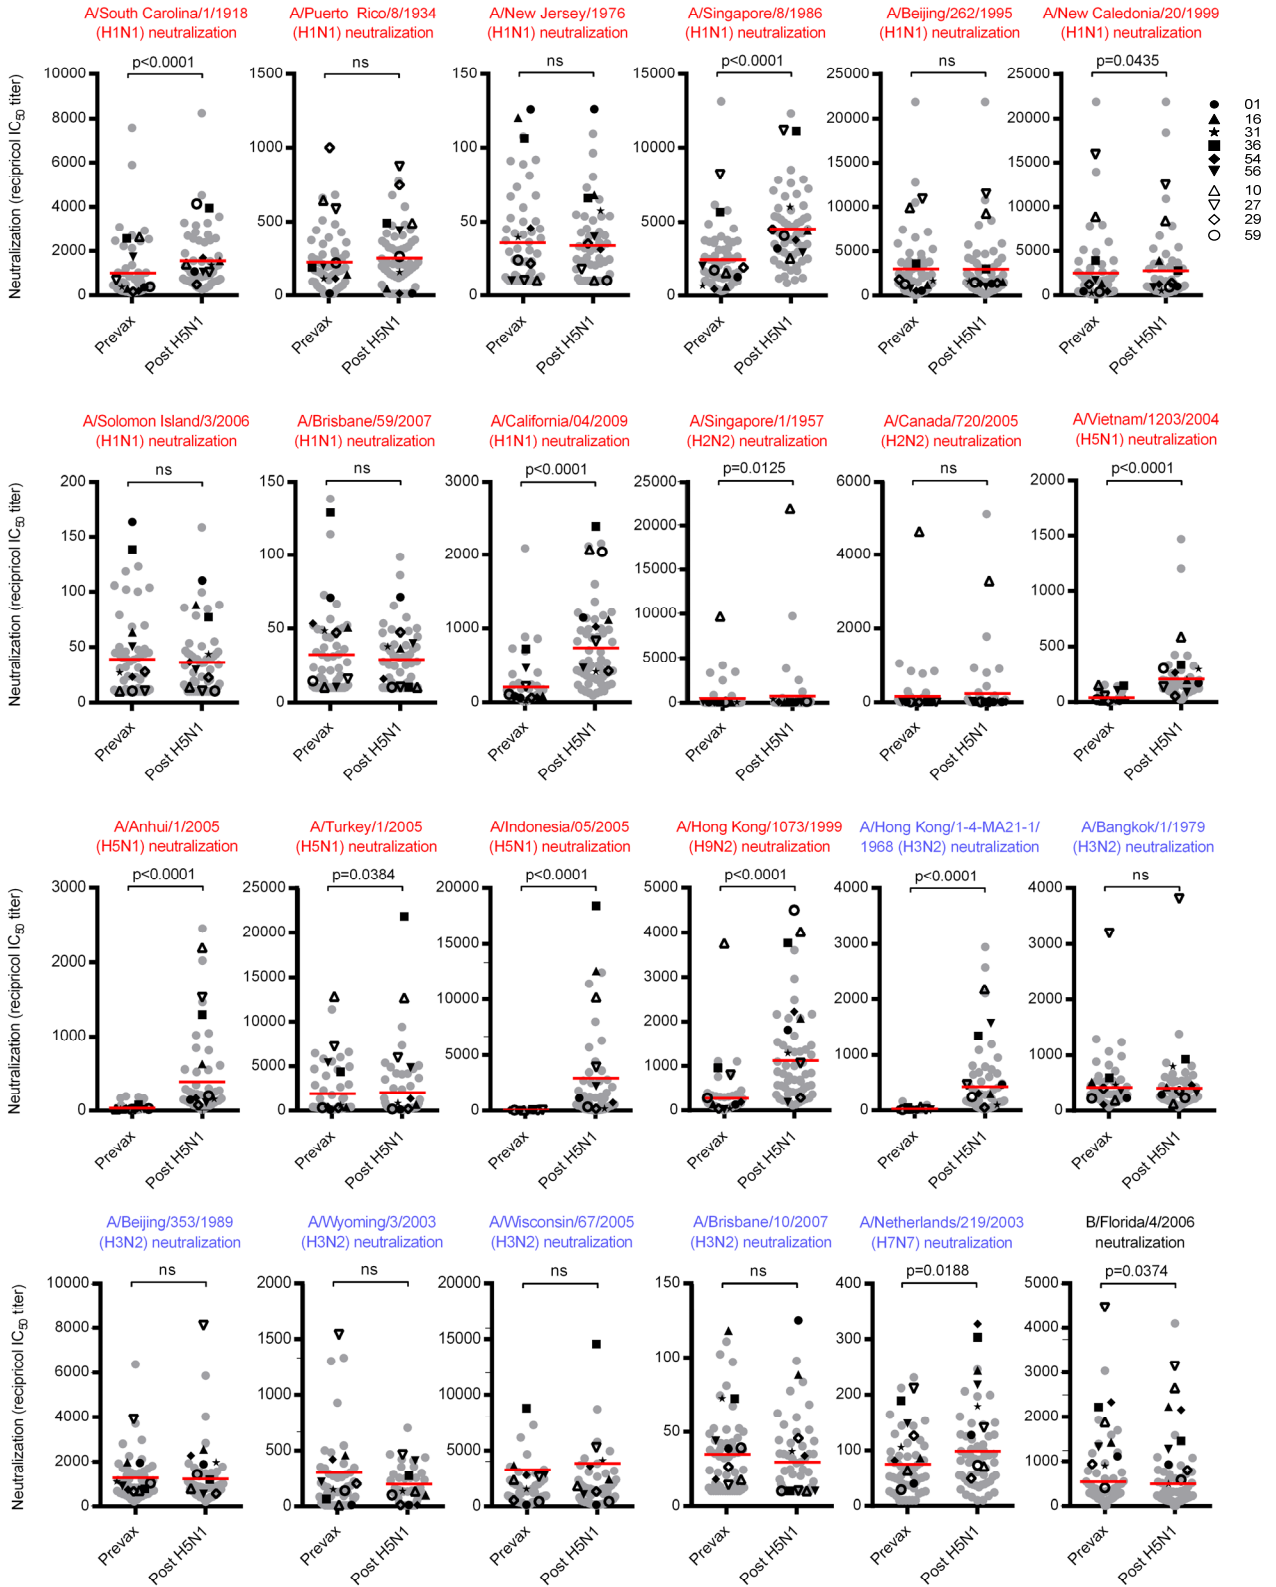

**Figure S1. VRC 310 subject sera neutralization of multiple influenza strains before and after H5 immunization, related to Figure 1.** Significant increases in neutralization titer following H5N1 immunization across all subjects (black dots) are indicated by a  $P$  value above the pre-vaccination and 2 weeks post-boost neutralization titer values. ( $P$  values were determined using a Wilcoxon Ranked sum-test, red horizontal line marks the mean of the samples,  $n=63$ ). Subjects whose responses were further analyzed at the B cell level are indicated by black open and closed shape markers as indicated.
