# Supplementary material
Source: PubMed Central journal article supplement (PMC4978566)
Supplement: NIHMS804937-supplement-2.pdf [file NIHMS804937-supplement-2.pdf]

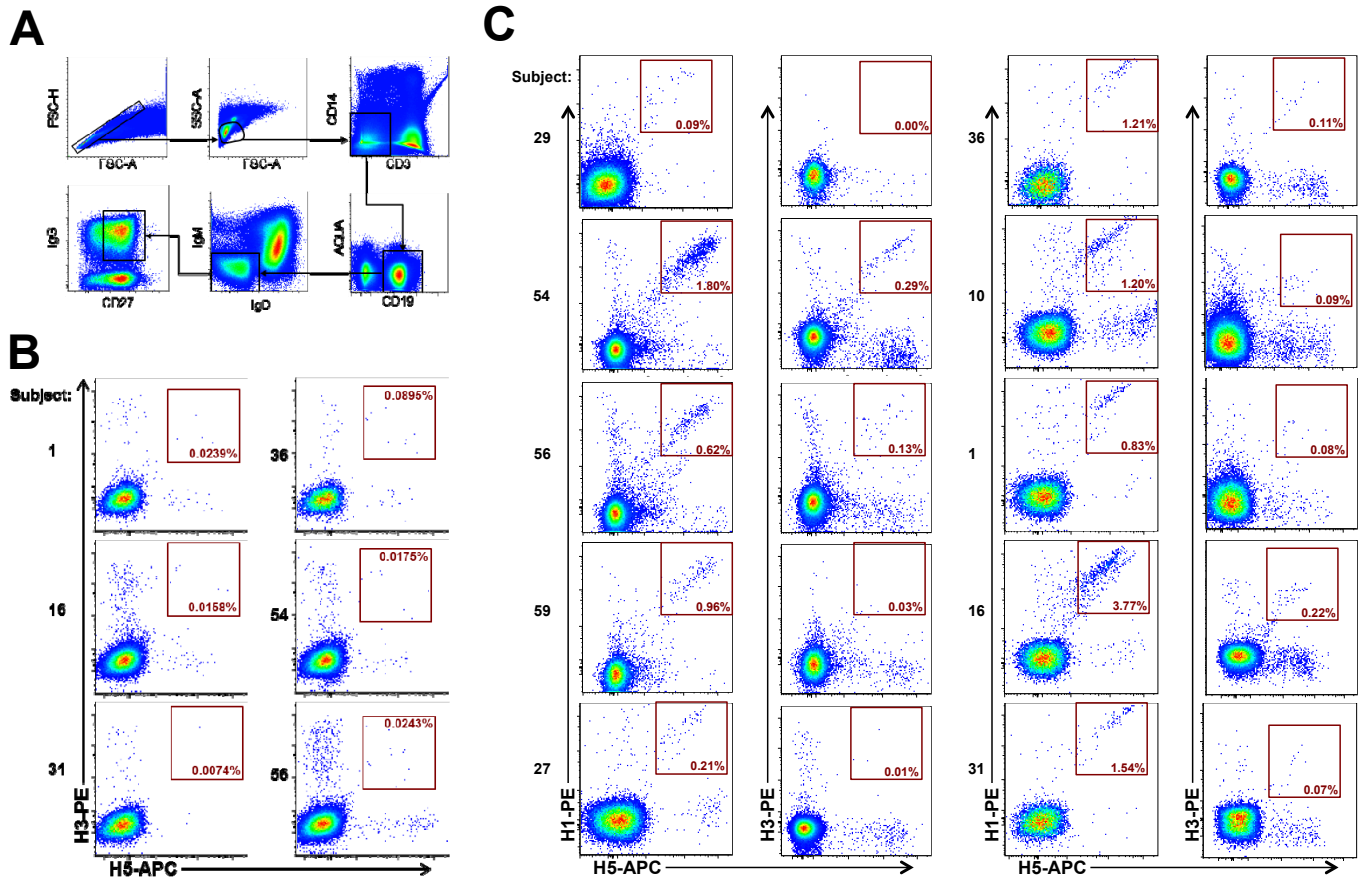

**Figure S2. Flow cytometry cell sorting (FACS) gating strategy and analysis of PBMC samples from ten subjects, related to Figure 1. (A)** Memory B cells were sorted by CD14<sup>-</sup>, CD3<sup>-</sup>, CD19<sup>+</sup>, IgD<sup>-</sup>, IgM<sup>-</sup>, CD27<sup>+</sup>, IgG<sup>+</sup> reactivity prior to sorting based on HA reactivity. After gating for single lymphocytes and the exclusion of CD14<sup>+</sup> monocytes, CD3<sup>+</sup> T cells and dead cells, CD27<sup>+</sup> IgG<sup>+</sup> IgD<sup>-</sup> IgM<sup>+</sup> CD19<sup>+</sup> B cells were stained with recombinant HA probes to resolve H5(A/Indonesia/05/2005) / H1(A/New Caledonia/20/1999) or H5/ H3 (A/Perth/16/2009) cross-reactive B cell populations. **(B)** Pre-vaccination samples was available for six donors to allow group 1-2 B cell sorting. **(C)** Group 1 cross-reactive (H1+H5<sup>+</sup>) and group 1-2 cross-reactive (H3+H5<sup>+</sup>) FACS plots for ten subjects are shown.
