# Supplementary material
Source: PubMed Central journal article supplement (PMC4978566)
Supplement: NIHMS804937-supplement-4.pdf [file NIHMS804937-supplement-4.pdf]

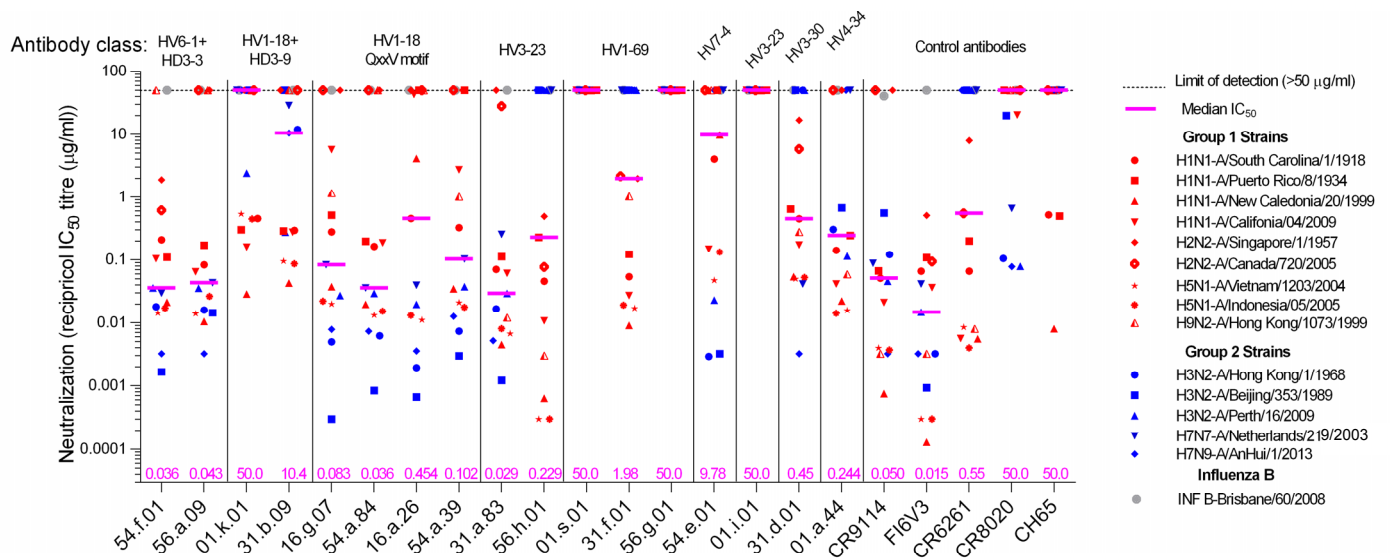

**Figure S4. Neutralization of Influenza strains assessed using pseudovirus entry inhibition assay, related to Figures 1-6.** Antibodies isolated from VRC310 donors were tested for neutralization using a pseudovirus inhibition entry assay against fifteen influenza A strains and one influenza B strain. The antibody class is indicated at the top of the graph. The Median IC<sub>50</sub> for each antibody is indicated by a horizontal line and the value (µg/ml) is shown at the base of the graph.
