# Supplementary material
Source: PubMed Central journal article supplement (PMC4978566)
Supplement: NIHMS804937-supplement-7.pdf [file NIHMS804937-supplement-7.pdf]

**A**

|            | H3-Brisbane<br>2007 | H3-California<br>2004 | H3-Moscow<br>1999 | H3-Perth<br>2009 | H3-Sydney<br>1997 |
|------------|---------------------|-----------------------|-------------------|------------------|-------------------|
| 56.a.09    | 2966000             | 3037000               | 2886000           | 2975000          | 3010000           |
| M98A       | 3068000             | 3088000               | 2786000           | 3041000          | 3042000           |
| F100A      | 55806               | 3907                  | 1102              | 5379             | 9559              |
| M98A-F100A | 14033               | 12423                 | 11793             | 14405            | 13726             |

  

|            | H1-California<br>2009 | H3-Hong Kong<br>1968 |            | H1-California<br>2009 | H3-Hong Kong<br>1968 |
|------------|-----------------------|----------------------|------------|-----------------------|----------------------|
| 56.a.09    | 3033000               | 2987000              | 54.f.01    | 3138000               | 3097000              |
| R52bA      | 3159000               | 3165000              | R52bA      | 3196000               | 3164000              |
| W55A       | 3235000               | 3203000              | W55A       | 3175000               | 3133000              |
| R52bA-W55A | 3134000               | 3157000              | R52bA-W55A | 3167000               | 3140000              |

  

|                | H1-California<br>2009 | H3-Hong Kong<br>1968 |                | H1-California<br>2009 | H3-Hong Kong<br>1968 |
|----------------|-----------------------|----------------------|----------------|-----------------------|----------------------|
| 56.a.09        | 3033000               | 2987000              | 54.f.01        | 3138000               | 3097000              |
| g6-1CDRH2      | 3125000               | 3060000              | g6-1CDRH2      | 3237000               | 3187000              |
| 4-39CDRH2      | 322916                | 4087                 | 4-59*05CDRH2   | 3151000               | 3081000              |
| 4-61CDRH2      | 731879                | 11364                | 4-61CDRH2      | 3191000               | 1932000              |
| 4-30-2*05CDRH2 | 401561                | 90010                | 4-30-2*05CDRH2 | 2691000               | 5532                 |
| 4-30-4CDRH2    | 128359                | 11716                | 4-31-CDRH2     | 3139000               | 654981               |

  

|              | H1-California<br>2009 | H3-Hong Kong<br>1968 |              | H1-California<br>2009 | H3-Hong Kong<br>1968 |
|--------------|-----------------------|----------------------|--------------|-----------------------|----------------------|
| 56.a.09 gVDJ | 3152000               | 3106000              | 54.f.01 gVDJ | 1926000               | 6992                 |
| R52bA        | 2785000               | 237750               | R52bA        | 6734                  | 7433                 |
| W55A         | 3187000               | 3143000              | W55A         | 540219                | 3194                 |
| R52bA-W55A   | 1748000               | 7493                 | R52bA-W55A   | 630.9                 | 2176                 |

  

|                | H1-California<br>2009 | H3-Hong Kong<br>1968 |              | H1-California<br>2009 | H3-Hong Kong<br>1968 |
|----------------|-----------------------|----------------------|--------------|-----------------------|----------------------|
| 4-30-4CDRH2    | 1559                  | 574.2                | 4-30-2CDRH2  | 5477                  | 3788                 |
| 4-30-2*05CDRH2 | 3432                  | 2693                 | 4-31CDRH2    | 5529                  | 1687                 |
| 4-39CDRH2      | 403.4                 | 3063                 | 4-59*05CDRH2 | 6326                  | 4822                 |
| 4-61CDRH2      | 3614                  | 1127                 | 4-61CDRH2    | 1966                  | 3863                 |

  

|                  | H1-California<br>2009 | H3-Hong Kong<br>1968 |               | H1-California<br>2009 | H3-Hong Kong<br>1968 |
|------------------|-----------------------|----------------------|---------------|-----------------------|----------------------|
| gD3-3*01CDRH3    | 3158000               | 3088000              | gD3-3*01CDRH3 | 2794000               | 3078000              |
| D3-9fr1CDRH3     | 7926                  | 20333                |               |                       |                      |
| D3-10fr3CDRH3    | 950                   | 2105                 |               |                       |                      |
| D3-10CDRH3-A     | 9591                  | 2612000              |               |                       |                      |
| D6-13invfr2CDRH3 | 496.2                 | 2938000              |               |                       |                      |

**B**

|             | H3-Brisbane<br>2007 | H3-California<br>2004 | H3-Moscow<br>1999 | H3-Perth<br>2009 | H3-Sydney<br>1997 |
|-------------|---------------------|-----------------------|-------------------|------------------|-------------------|
| 16.a.26     | 2911000             | 2887000               | 2808000           | 2865000          | 2797000           |
| Q98A        | 3305000             | 3273000               | 3217000           | 3304000          | 3196000           |
| V100aA      | 3458000             | 3389000               | 3354000           | 3439000          | 3330000           |
| Q98A-V100aA | 3180000             | 2345000               | 2512000           | 3069000          | 2623000           |

  

|                | H1-California<br>2009 | H3-Hong Kong<br>1968 |                | H1-California<br>2009 | H3-Hong Kong<br>1968 |
|----------------|-----------------------|----------------------|----------------|-----------------------|----------------------|
| 16.g.07        | 2965000               | 3100000              | 16.a.26        | 3027000               | 3092000              |
| 16.g.07-S52N   | 23182                 | 3082000              | 16.a.26-S52N   | 2979000               | 3105000              |
| 16.g.07-S52I   | 8512                  | 3116000              | 16.a.26-S52I   | 2773000               | 3010000              |
| 16.g.07-G33Y   | 6355                  | 37197                | 16.a.26-G33Y   | 3171000               | 3165000              |
| 16.g.07-G33S   | 2707000               | 1819000              | 16.a.26-G33S   | 3182000               | 3147000              |
| 16.g.07-HV1-45 | 5094                  | 5907                 | 16.a.26-HV1-45 | no expression         | no expression        |
| 16.g.07-HV1-68 | no expression         | no expression        | 16.a.26-HV1-68 | no expression         | no expression        |

  

|                | H3-Brisbane<br>2007 | H3-California<br>2004 | H3-Moscow<br>1999 | H3-Perth<br>2009 | H3-Sydney<br>1997 |
|----------------|---------------------|-----------------------|-------------------|------------------|-------------------|
| H-mature/L-UCA | 3033000             | 2702000               | 2408000           | 2938000          | 2584000           |
| H-UCA/L-mature | 12395               | 13231                 | 10772             | 15573            | 2128000           |
| H-UCA/L-UCA    | 1016000             | 11991                 | 10049             | 728902           | 12702             |

  

|              | H1-California<br>2009 | H3-Hong Kong<br>1968 |              | H1-California<br>2009 | H3-Hong Kong<br>1968 |
|--------------|-----------------------|----------------------|--------------|-----------------------|----------------------|
| 16.g.07-gVDJ | 5450                  | 133960               | 16.a.26-gVDJ | 6532                  | 3104000              |

**C**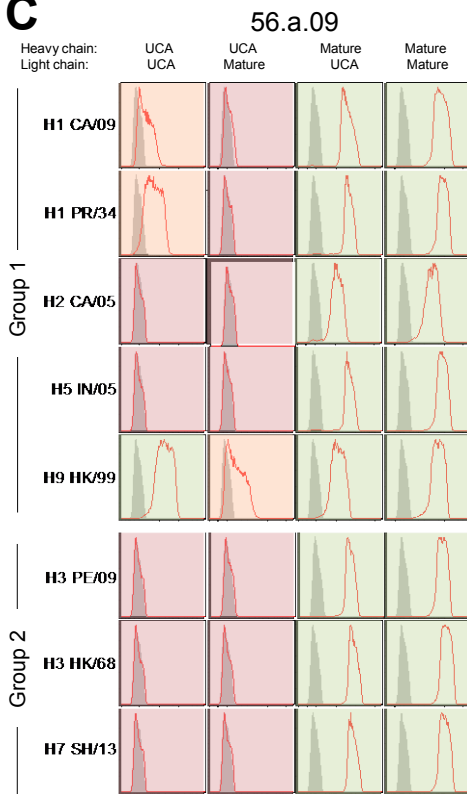**D**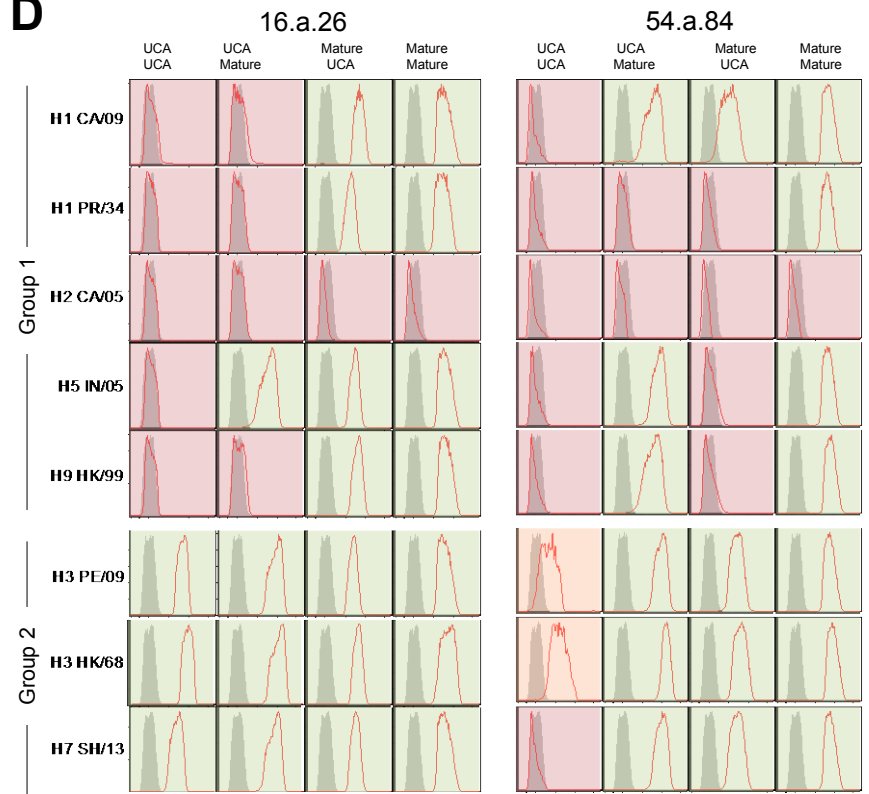

**Figure S7. Multidonor class recognition: binding of germline and contact residue variants, related to Figures 2-7. (A)** HV6-1+HD3-3 antibody HA binding. (Top panel) critical contact residues from CDR H3 were mutated and assessed for binding to five H3 HA molecules by MSD-ECLIA with area under the curve indicated and colored from red (high binding) to blue (low binding). (Middle panel) CDR H2 residues were varied by mutation of individual residues or by replacement of entire CDR H2 region and assessed for binding to a H1 and H3 HA. (Lower panel) germline reverted versions and mutants were assessed for binding to a H1 and H3 HA. **(B)** HV1-18 (Q-x-x-V) antibody HA binding. (Top panel) critical contact residues from CDR H3 were mutated and assessed for binding to HA molecules. (Middle panel) HV1-18 framework residues G33 and S52, as well as HV gene replacement were assessed for their effect on HA binding. (Lower two panels) germline reverted antibodies were assessed for HA binding. **(C and D)** Cell surface expressed antibodies (mature and UCA combinations) were assessed for binding to group 1 and group 2 HA molecules by flow cytometry. Variant sequences are provided in Table S3.
